# Supplementary material for: Pervasive and diverse collateral sensitivity profiles inform optimal strategies to limit antibiotic resistance
Source: bioRxiv or medRxiv preprint supplement (doi:10.1101/241075), 2019-08-27
Supplement: Supplementary file [file media-1.pdf]

## **Supplemental Information: Pervasive and diverse collateral sensitivity profiles inform optimal strategies to limit antibiotic resistance**

Jeff Maltas<sup>1</sup> and Kevin B. Wood<sup>1,2</sup>

<sup>1</sup>*Department of Biophysics, University of Michigan, Ann Arbor, MI 48109*

<sup>2</sup>*Department of Physics, University of Michigan, Ann Arbor, MI 48109*

The Supplemental Information (SI) contains eleven additional figures (S1-S9), one table (S1), an html file of annotated sequencing results (SIAnnotatedSequencingResults.html) and a spreadsheet with statistics of logistic regression (SILogRegressionStatistics.xlsx).

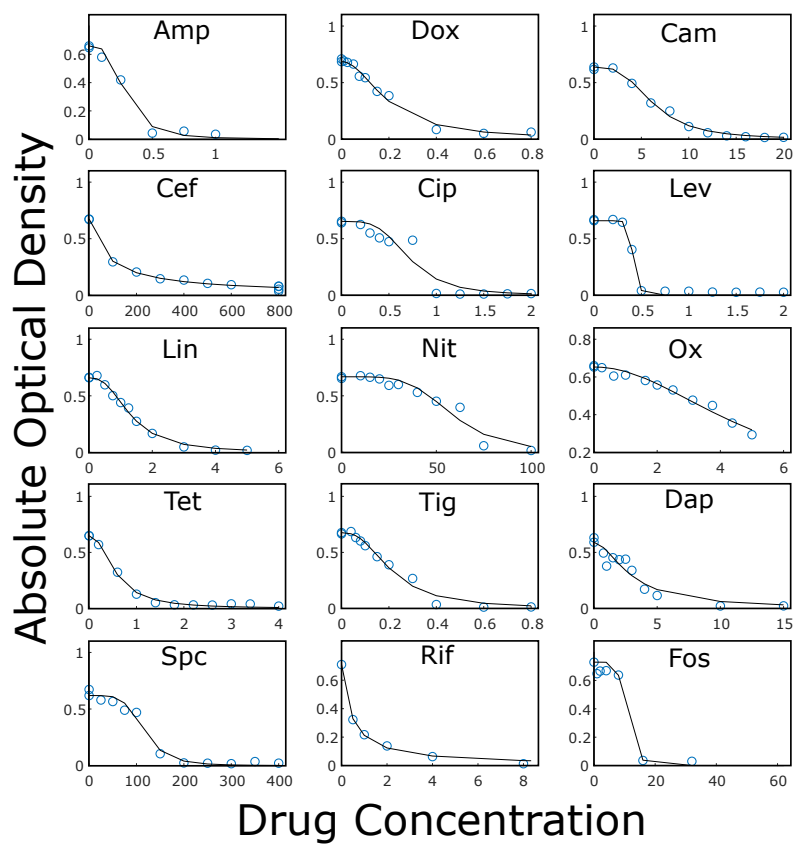

FIG. S1. **Example dose response curves for each drug** Optical density (OD) of V583 cultures after 12 hours of incubation at various drug concentrations (blue circles). All drug concentrations are measured in  $\mu\text{g}/\text{mL}$ . Lines: fit of normalized dose response curve to Hill-like function  $f(x) = (1 + (x/K)^h)^{-1}$ , with  $K$  the  $\text{IC}_{50}$  and  $h$  a Hill coefficient.

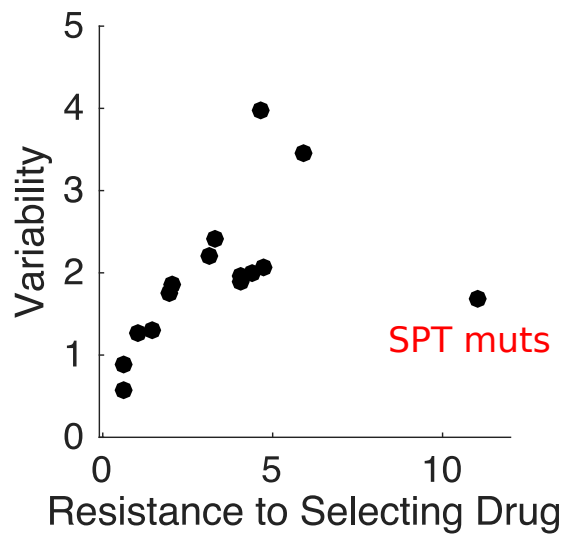

FIG. S2. **Variation in collateral profiles is correlated with resistance to selecting drug.**

Variability in collateral profiles between mutants selected by the same drug is defined by first representing each mutant's collateral profile as a vector  $\vec{C}$  in 15-dimensional drug space. Dimension  $i$  represents the  $\log_2$ -scaled fold increase in  $IC_{50}$  (relative to wild-type) for drug  $i$ . The variability for a set of mutants evolved to the same drug is then given by the average Euclidean distance  $d_i$  for a mutant from the centroid. Scatter plot between the variability (with effects of selecting drug included) and the ( $\log_2$ -scaled) fold increase in  $IC_{50}$  to the selecting drug (Spearman correlation of 0.70,  $p = 0.005$  including the spc mutants; 0.87,  $p < 10^{-4}$  without the spc mutants.).

TABLE I. Mutant Number Table For Dendrograms

| <b>Mutant Number</b> | <b>Drug Name</b> |
|----------------------|------------------|
| 1-4                  | Daptomycin       |
| 5-8                  | Ampicillin       |
| 9-12                 | Oxacillin        |
| 13-16                | Ceftriaxone      |
| 17-20                | Fosfomycin       |
| 21-24                | Tetracycline     |
| 25-28                | Doxycycline      |
| 29-32                | Tigecycline      |
| 33-36                | Spectinomycin    |
| 37-40                | Linezolid        |
| 41-44                | Ciprofloxacin    |
| 45-48                | Levofloxacin     |
| 49-52                | Rifampicin       |
| 53-56                | Chloramphenicol  |
| 57-60                | Nitrofurantoin   |

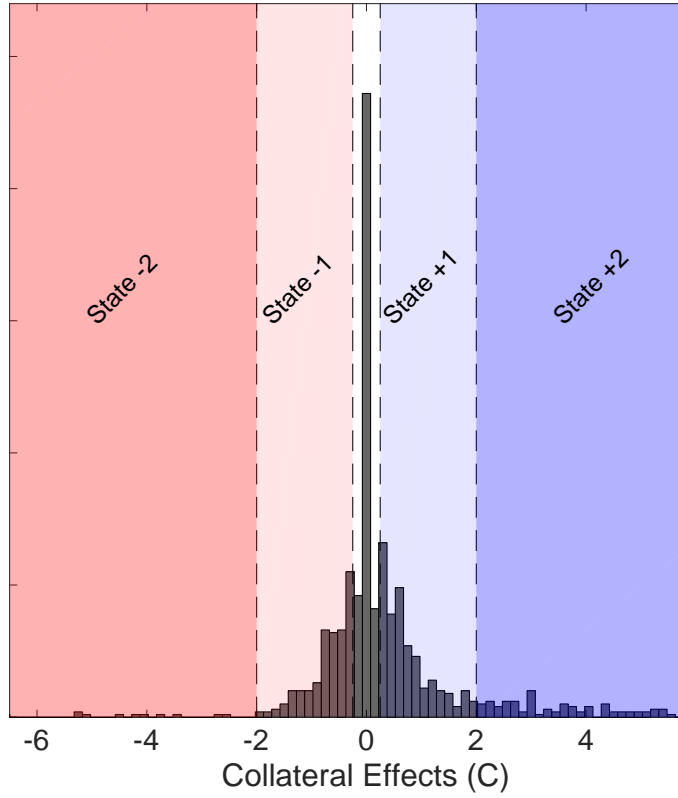

FIG. S3. **Discretization of collateral effects** Histogram of collateral effects ( $C > 0$  resistance,  $C < 0$  sensitivity). Shaded regions indicate the five levels of discretization chosen for the MDP model ( $C < -2$ , red;  $-2 \leq C < -0.25$ , light red;  $-0.25 \leq C \leq 0.25$ , white;  $0.25 < C \leq 2$ , light blue;  $C > 2$ , dark blue). The discretized values range from -2 (reducing resistance by two levels) to +2 (increasing resistance by two levels).

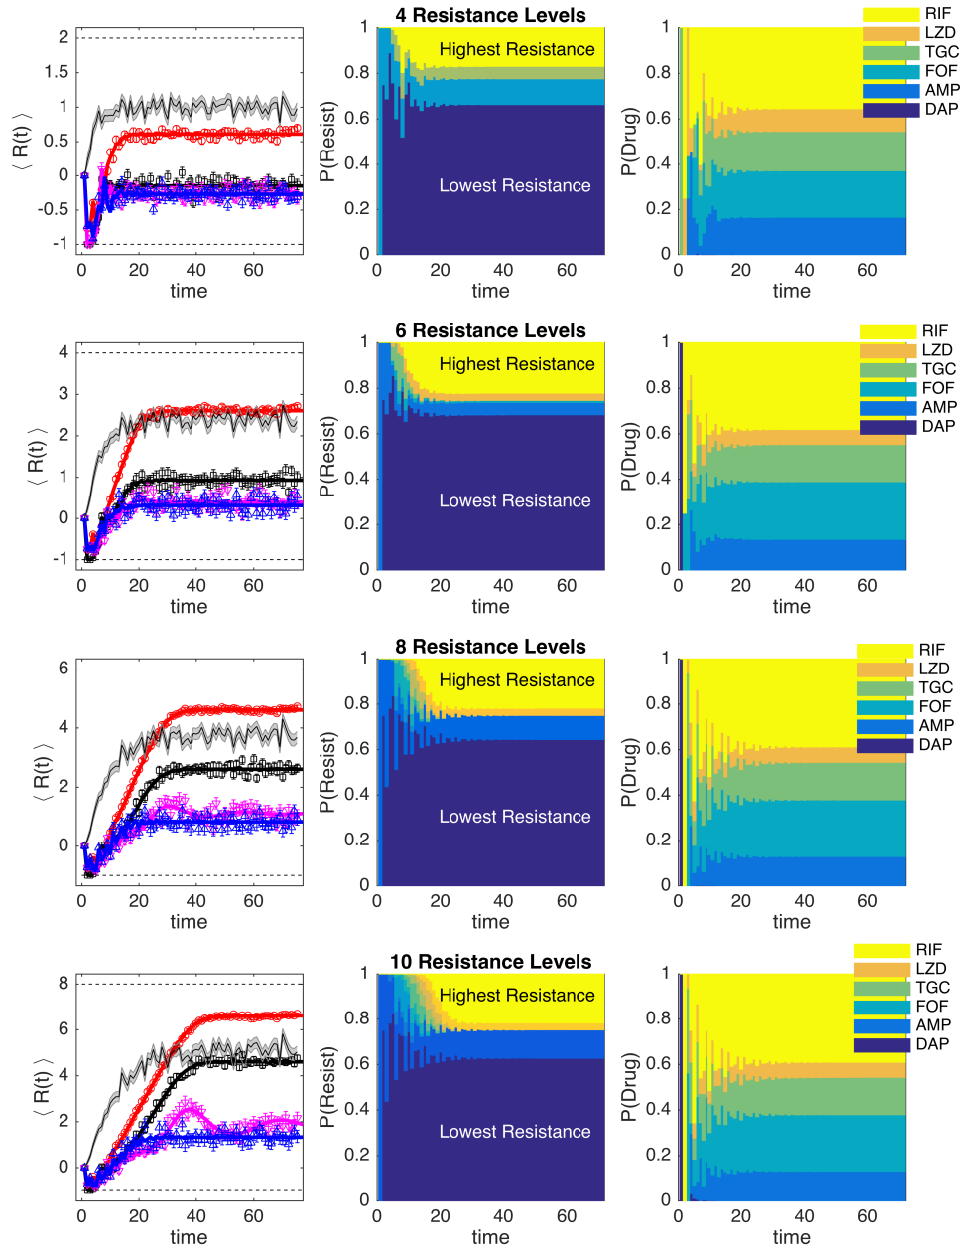

FIG. S4. MDP models with different numbers of states show similar qualitative behavior In all panels, the MDP is solved for a selection of six drugs: daptomycin (DAP), ampicillin (AMP), fosfomycin (FOF), tigecycline (TGC), linezolid (LZD), and rifampicin (RIF). Left column: Average level of resistance ( $\langle R(t) \rangle$ ) to the applied drug for policies with  $\gamma = 0$  (red),  $\gamma = 0.7$  (black),  $\gamma = 0.9$  (magenta), and  $\gamma = 0.99$  (blue). Resistance to each drug is characterized by 4 (top row), 6, 8, or 10 (bottom row) discrete levels. At time 0, the population starts in the second lowest resistance level (0) for all drugs. Symbols (circles, triangles, squares) are the mean of  $10^3$  independent simulations of the MDP, with error bars  $\pm$  SEM. Solid lines are numerical calculations using exact Markov chain calculations (see Methods). Black shaded line, randomly cycled drugs. Middle column: The probability  $P(\text{Resist})$  of the population exhibiting a particular level of resistance to the applied drug when the optimal policy ( $\gamma = 0.99$ ) is used. Right column: The time-dependent probability  $P(\text{Drug})$  of choosing each of the six drugs when the optimal policy ( $\gamma = 0.99$ ) is used.

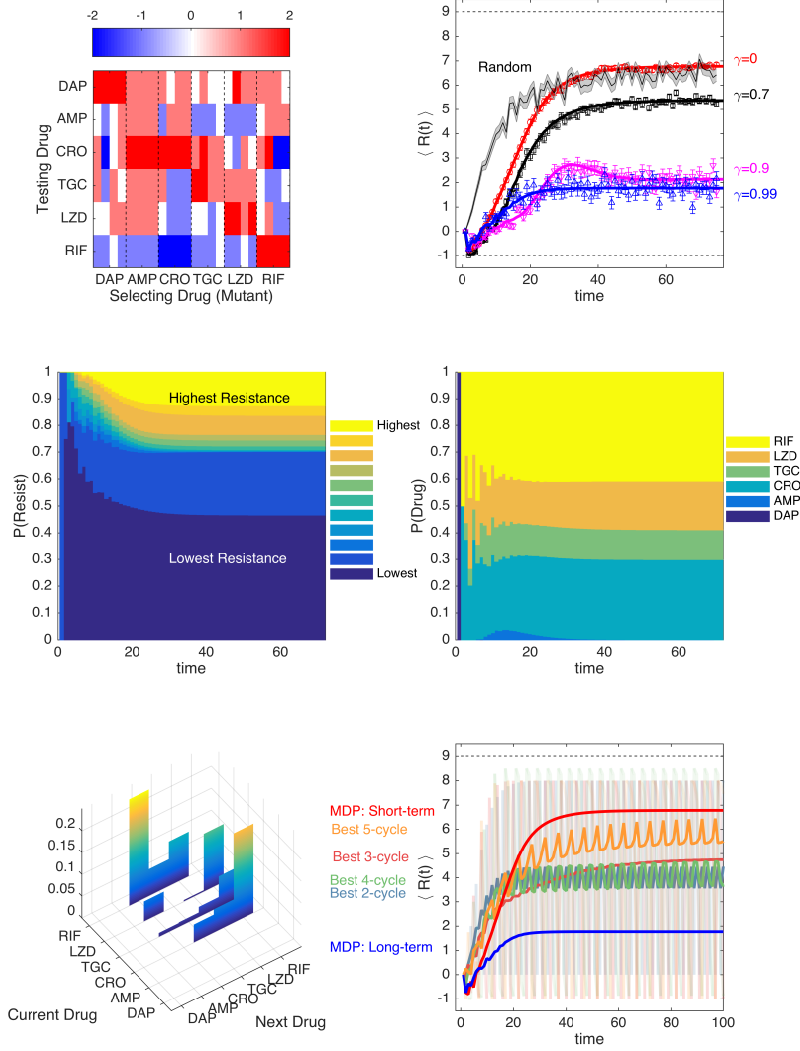

**FIG. S5. Optimal drug sequences constrain resistance on long timescales and outperform simple collateral sensitivity cycles** A. Average of discretized collateral sensitivity or resistance  $C_d \in \{-2, -1, 0, 1, 2\}$  for a selection of six drugs: daptomycin (DAP), ampicillin (AMP), ceftriaxone (CRO), tigecycline (TGC), linezolid (LZD), and rifampicin (RIF). For each selecting drug, the heat map shows the average value of  $C_d$  from  $n_r = 4$  independently evolved populations. See Fig 1 for original (non-discretized) data. B. Average level of resistance ( $\langle R(t) \rangle$ ) to the applied drug for policies with  $\gamma = 0$  (red),  $\gamma = 0.7$  (black),  $\gamma = 0.9$  (magenta), and  $\gamma = 0.99$  (blue). Resistance to each drug is characterized by 11 discrete levels ranging from -1 (least resistant) to 9 (most resistant). At time 0, the population starts in the second lowest resistance level (0) for all drugs. Symbols (circles, triangles, squares) are the mean of  $10^3$  independent simulations of the MDP, with error bars  $\pm$  SEM. Solid lines are numerical calculations using exact Markov chain calculations (see Methods). Black shaded line, randomly cycled drugs. C. The probability  $P(\text{Resist})$  of the population exhibiting a particular level of resistance to the applied drug when the optimal policy ( $\gamma = 0.99$ ) is used. D. The time-dependent probability  $P(\text{Drug})$  of choosing each of the six drugs when the optimal policy ( $\gamma = 0.99$ ) is used. E. Steady state joint probability distribution  $P(\text{current drug}, \text{next drug})$  for consecutive time steps when the optimal policy ( $\gamma = 0.99$ ) is used. F. Average level of resistance ( $\langle R(t) \rangle$ ) to the applied drug for collateral sensitivity cycles of 2 (dark green, CRO-RIF), 3 (pink, RIF-CRO-TGC), 4 (light green, TGC-LZD-AMP-RIF), and 5 (orange, AMP-RIF-CRO-TGC-LZD) drugs are compared with MDP policies with  $\gamma = 0$  (short-term, red) and  $\gamma = 0.99$  (long-term, blue). For visualizing the results of the collateral sensitivity cycles, which give rise to periodic behavior with large amplitude, the curves show a moving time average (window size 10 steps), but the smoothed curves are shown transparently in the background.

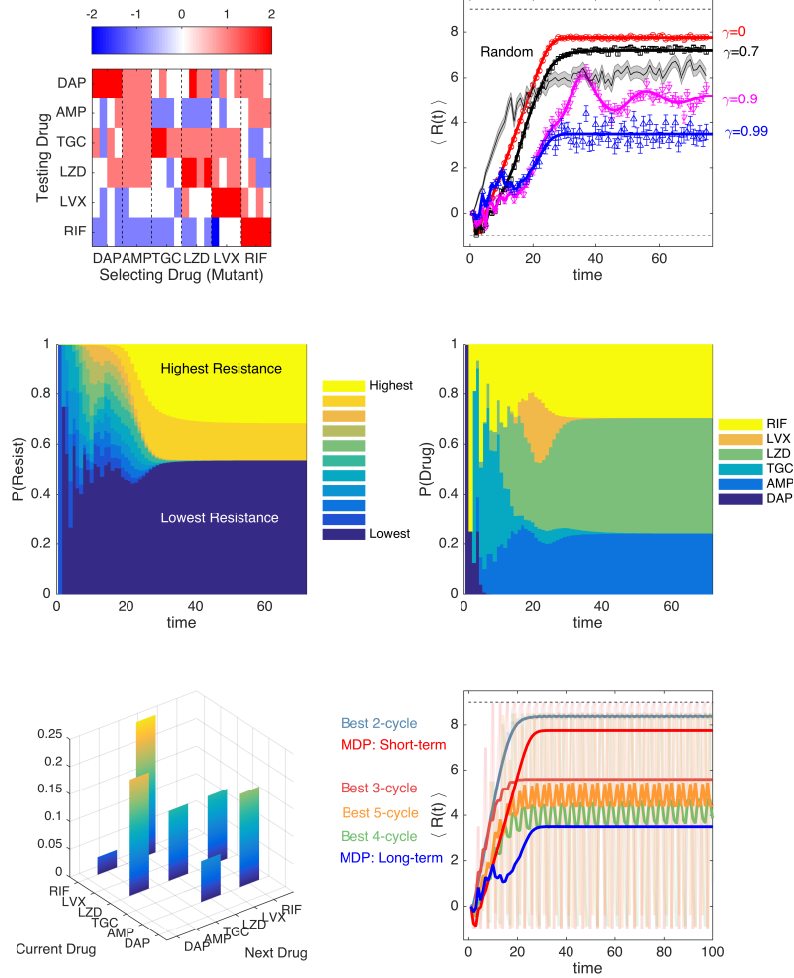

**FIG. S6. Optimal drug sequences constrain resistance on long timescales and outperform simple collateral sensitivity cycles** A. Average of discretized collateral sensitivity or resistance  $C_d \in \{-2, -1, 0, 1, 2\}$  for a selection of six drugs: daptomycin (DAP), ampicillin (AMP), tigecycline (TGC), linezolid (LZD), levofloxacin (LVX), and rifampicin (RIF). For each selecting drug, the heat map shows the average value of  $C_d$  from  $n_r = 4$  independently evolved populations. See Fig 1 for original (non-discretized) data. B. Average level of resistance ( $\langle R(t) \rangle$ ) to the applied drug for policies with  $\gamma = 0$  (red),  $\gamma = 0.7$  (black),  $\gamma = 0.9$  (magenta), and  $\gamma = 0.99$  (blue). Resistance to each drug is characterized by 11 discrete levels ranging from -1 (least resistant) to 9 (most resistant). At time 0, the population starts in the second lowest resistance level (0) for all drugs. Symbols (circles, triangles, squares) are the mean of  $10^3$  independent simulations of the MDP, with error bars  $\pm$  SEM. Solid lines are numerical calculations using exact Markov chain calculations (see Methods). Black shaded line, randomly cycled drugs. C. The probability  $P(\text{Resist})$  of the population exhibiting a particular level of resistance to the applied drug when the optimal policy ( $\gamma = 0.99$ ) is used. D. The time-dependent probability  $P(\text{Drug})$  of choosing each of the six drugs when the optimal policy ( $\gamma = 0.99$ ) is used. E. Steady state joint probability distribution  $P(\text{current drug}, \text{next drug})$  for consecutive time steps when the optimal policy ( $\gamma = 0.99$ ) is used. F. Average level of resistance ( $\langle R(t) \rangle$ ) to the applied drug for collateral sensitivity cycles of 2 (dark green, TGC-RIF), 3 (pink, LZD-AMP-LVX), 4 (light green, RIF-TGC-LZD-AMP), and 5 (orange, AMP-LVX-RIF-TGC-LZD) drugs are compared with MDP policies with  $\gamma = 0$  (short-term, red) and  $\gamma = 0.99$  (long-term, blue). For visualizing the results of the collateral sensitivity cycles, which give rise to periodic behavior with large amplitude, the curves show a moving time average (window size 10 steps), but the smoothed curves are shown transparently in the background.



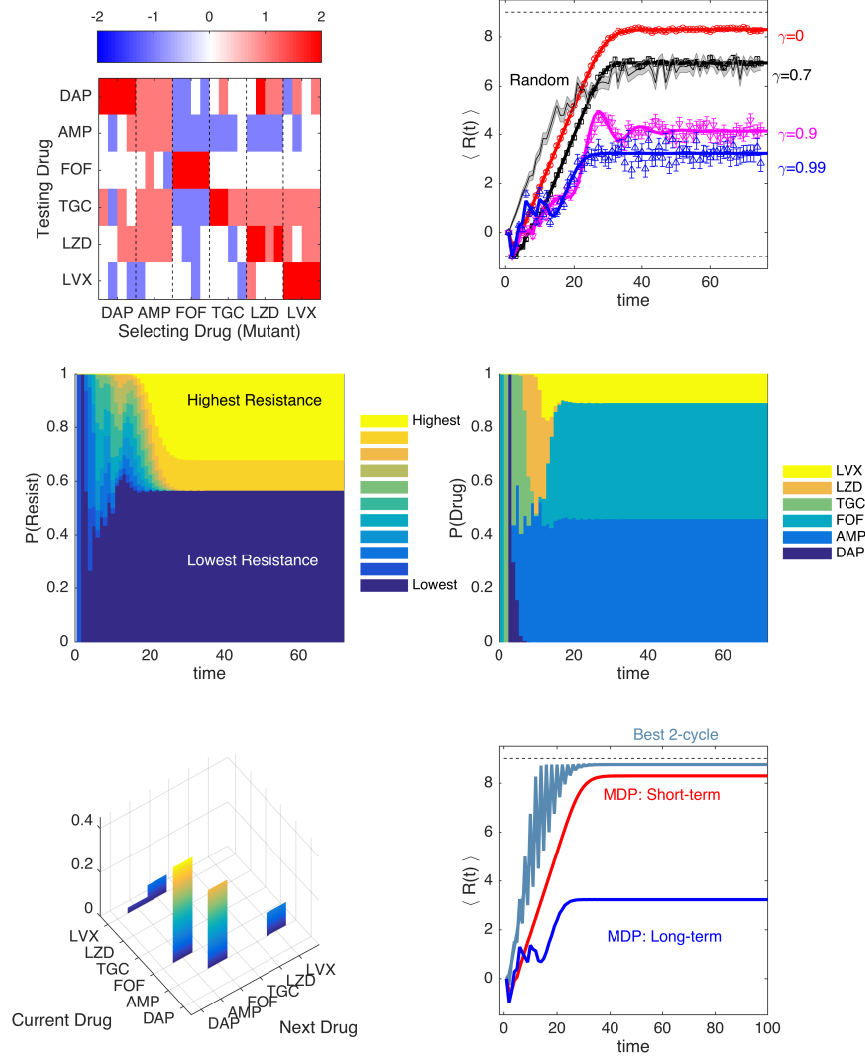

**FIG. S7. Optimal drug sequences constrain resistance on long timescales and outperform simple collateral sensitivity cycles** A. Average of discretized collateral sensitivity or resistance  $C_d \in \{-2, -1, 0, 1, 2\}$  for a selection of six drugs: daptomycin (DAP), ampicillin (AMP), tigecycline (TGC), linezolid (LZD), levofloxacin (LVX), and rifampicin (RIF). For each selecting drug, the heat map shows the average value of  $C_d$  from  $n_r = 4$  independently evolved populations. See Fig 1 for original (non-discretized) data. B. Average level of resistance ( $\langle R(t) \rangle$ ) to the applied drug for policies with  $\gamma = 0$  (red),  $\gamma = 0.7$  (black),  $\gamma = 0.9$  (magenta), and  $\gamma = 0.99$  (blue). Resistance to each drug is characterized by 11 discrete levels ranging from -1 (least resistant) to 9 (most resistant). At time 0, the population starts in the second lowest resistance level (0) for all drugs. Symbols (circles, triangles, squares) are the mean of  $10^3$  independent simulations of the MDP, with error bars  $\pm$  SEM. Solid lines are numerical calculations using exact Markov chain calculations (see Methods). Black shaded line, randomly cycled drugs. C. The probability  $P(\text{Resist})$  of the population exhibiting a particular level of resistance to the applied drug when the optimal policy ( $\gamma = 0.99$ ) is used. D. The time-dependent probability  $P(\text{Drug})$  of choosing each of the six drugs when the optimal policy ( $\gamma = 0.99$ ) is used. E. Steady state joint probability distribution  $P(\text{current drug, next drug})$  for consecutive time steps when the optimal policy ( $\gamma = 0.99$ ) is used. F. Average level of resistance ( $\langle R(t) \rangle$ ) to the applied drug for collateral sensitivity cycles of 2 (dark green, AMP-LVX) drugs are compared with MDP policies with  $\gamma = 0$  (short-term, red) and  $\gamma = 0.99$  (long-term, blue). For visualizing the results of the collateral sensitivity cycles, which give rise to periodic behavior with large amplitude, the curves show a moving time average (window size 10 steps), but the smoothed curves are shown transparently in the background.

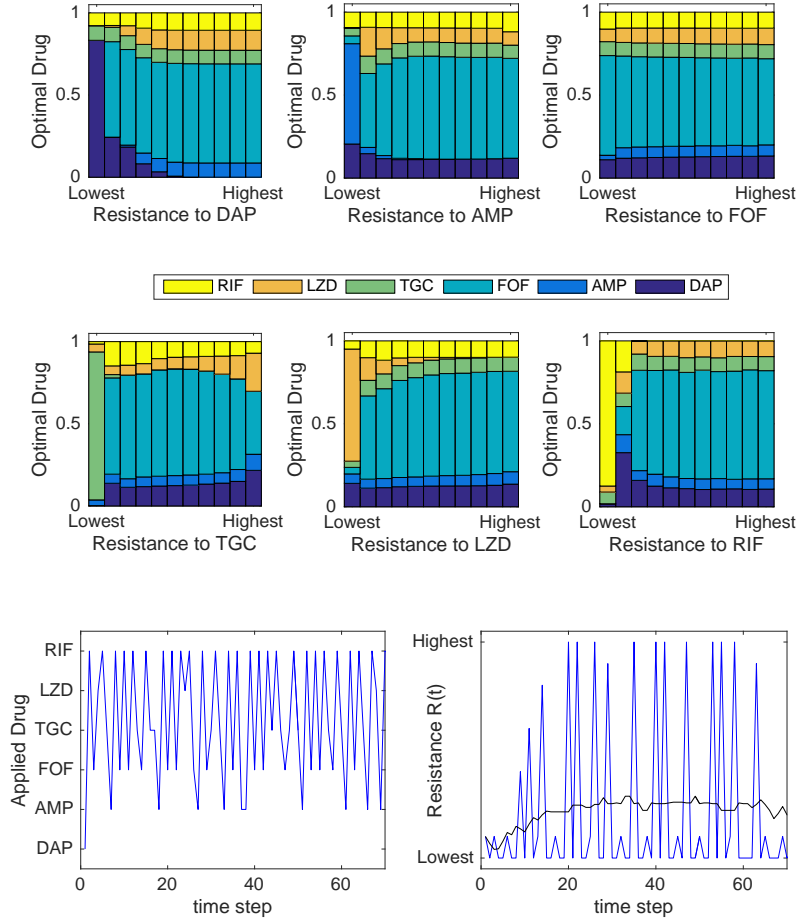

FIG. S8. **Optimal policy statistics and sample trajectories for  $\gamma = 0.99$**  The optimal policy  $\pi^*(s)$  is a mapping from the set of all possible resistance profiles ( $S$ ) to the set of drugs ( $A$ ). The policy associates each resistance profile with a unique (optimal) drug. Top panels: Frequency with which each drug is prescribed (according to the optimal policy) as a function of the level of resistance to an individual drug (horizontal axis). More specifically, for each of the six panels, the state space is partitioned into eleven distinct subsets, with each subset containing all states characterized by a given level of resistance to the particular drug in question (horizontal axis). The colored bars then show how frequently each of the six drugs is prescribed (according to the optimal policy) across all states within that subset. Bottom left panel: single simulated trajectory showing drug choice over time. Bottom right panel: single simulated trajectory of the instantaneous reward  $R$ , which corresponds to the resistance level to the applied drug. Blue curve is the specific trajectory; black curve is a moving average of the trajectory with a window size of 20.

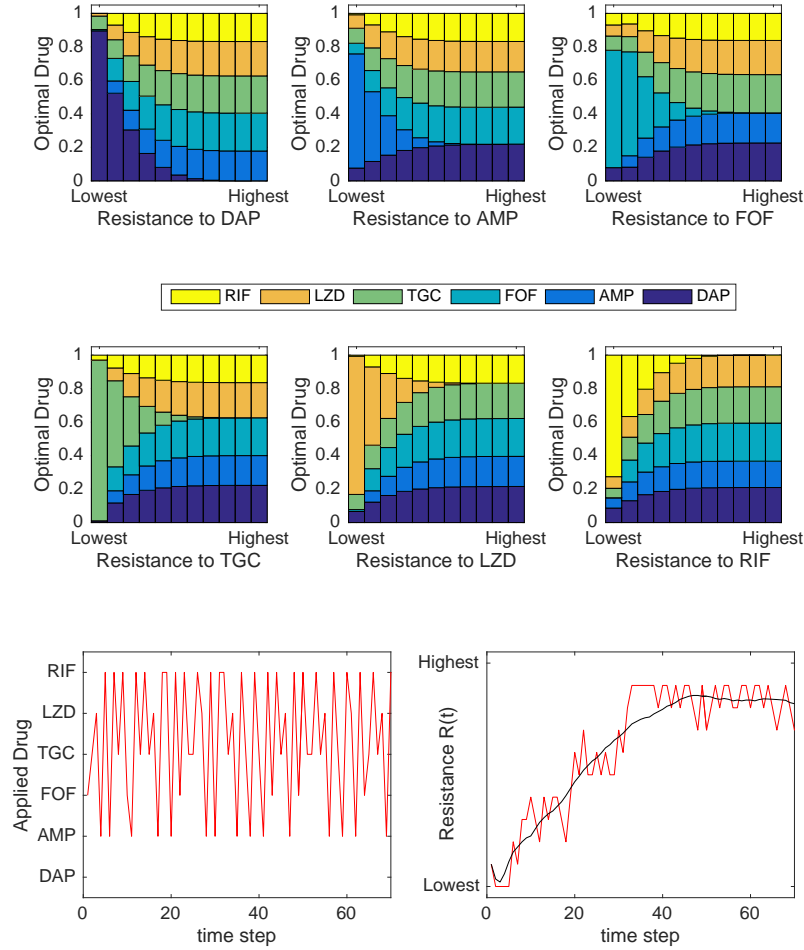

FIG. S9. **Optimal policy statistics and sample trajectories for  $\gamma = 0.1$**  Top panels: Frequency with which each drug is prescribed (according to the optimal policy) as a function of the level of resistance to an individual drug (horizontal axis). In each of the six panels, the state space is partitioned into eleven distinct subsets, with each subset containing all states with a given level of resistance to the particular drug in question. The colored bars then show how frequently each of the six drugs is prescribed across all states within that subset. Bottom left panel: single simulated trajectory showing drug choice over time. Bottom right panel: single simulated trajectory of the instantaneous reward  $R$ , which corresponds to the resistance level to the applied drug. Red curve is the specific trajectory; black curve is a moving average of the trajectory with a window size of 20.
